# Supplementary material
Source: PubMed Central journal article supplement (PMC10125271)
Supplement: bg2c00018_si_001.pdf [file bg2c00018_si_001.pdf]

# Supporting Information for

## **Characterization of LipS1 and LipS2 from *Thermococcus kodakarensis*: Proteins Annotated as Biotin Synthases, which Together Catalyze Formation of the Lipoyl Cofactor**

*Syam Sundar Neti<sup>‡</sup>, Debangsu Sil<sup>‡</sup>, Douglas M. Warui<sup>‡</sup>, Olga A. Esakova<sup>‡</sup>, Amy E. Solinski<sup>‡</sup>,  
Dante A. Serrano<sup>§</sup>, Carsten Krebs<sup>\*,‡,§</sup>, and Squire J. Booker<sup>\*,‡,§,#</sup>*

<sup>‡</sup>Department of Chemistry, The Pennsylvania State University, University Park, Pennsylvania 16802, USA.

<sup>§</sup>Department of Biochemistry and Molecular Biology, The Pennsylvania State University, University Park, Pennsylvania 16802, USA.

<sup>#</sup>Howard Hughes Medical Institute, The Pennsylvania State University, University Park, Pennsylvania 16802, USA.

\*To whom correspondence should be addressed: Squire J. Booker ([sjb14@psu.edu](mailto:sjb14@psu.edu)); Carsten Krebs ([ckrebs@psu.edu](mailto:ckrebs@psu.edu))

## Table of Contents

|                                                                                |           |
|--------------------------------------------------------------------------------|-----------|
| 1) LipS1 codon optimized gene sequence and protein sequence.....               | S3        |
| 2) LipS2 codon optimized gene sequence and protein sequence.....               | S4        |
| 3) LipS1 auxiliary cysteine mutagenic primers (5' – 3').....                   | S5        |
| 4) LipS2 auxiliary cysteine mutagenic primers (5' – 3').....                   | S6        |
| 5) LipS1 & LipS2 RS cysteine mutagenic primers (5' – 3').....                  | S7        |
| 6) LC-MS gradient and MRM conditions for product analysis.....                 | S8        |
| 7) Non-lipoyl RS enzymes involved in sulfur insertion reactions .....          | S9        |
| 8) EPR spectra of LipS1.....                                                   | S10       |
| 9) Mössbauer spectra of reconstituted and as-isolated LipS1 $\Delta$ RS.....   | S11       |
| 10) Mössbauer spectra of reconstituted LipS2 $_{WT}$ .....                     | S12       |
| 11) Mössbauer spectra of reconstituted LipS2 $\Delta$ RS.....                  | S13       |
| 12) Parameters used to simulate Mossbauer spectra.....                         | S14       |
| 13) Activity plots of LipS1 $_{WT}$ and LipS2 $_{WT}$ using Ferredoxin.....    | S15       |
| 14) $^{34}S$ -labeled LipS1 and LipS2 reactions.....                           | S16       |
| 15) Activity plots of LipS1 $\Delta$ RS and LipS2 $\Delta$ RS variants.....    | S17       |
| 16) UV-vis spectra of LipS1 and LipS2 auxiliary ligand mutants.....            | S18       |
| 17) Reactions of T28A, S113A, S115A LipS2 with octanoyllysyl peptide.....      | S19       |
| 18) Genome analysis of LipS1 and LipS2.....                                    | S20 – S23 |
| 19) UV-vis spectral comparison of LipS1 $_{WT}$ , LipS1 $\Delta$ RS.....       | S24       |
| 20) Confidence scores of LipS1 and LipS2 models based on AlphaFold server..... | S25       |

### LipS1 (TK2109) codon-optimized gene sequence (Uniprot # Q5JEV3)

**CATATG**GCAGAGCCGAAAAAAGCTGAAAATCTATATTCCGGGTATCAAATTTCC  
GAGCGTTAGCCTGACCGGTAATGCATGTGCACTGAATTGTGCACATTGCGGTAAACA  
TTATCTGGAAGGTATGCGTAAACCGGAACGTGGTGAAGCTGCTGAGCTATTGTCTGCG  
TCTGGCCGAAGAAGGTTATAACGGTTGTCTGCTGAGCGGTGGTATGGATGGTTCGTCT  
GAAAGTTCGCTGGATTTTTATGCCAACGAAATCAAAGAGATCAAGAAACGCACCA  
ACCTGAAACTGAATGCACATGTGGGTTTTATCGATGAAAGCGATCTGGAATGGGTG  
AAATATGTTGATGTTGTGAGCCTGGATTTTGTGGGTGATAATGATGTTATTCGTCGC  
GTGTACAAAATCGACAAAACCGTTGATGATTATCTGCGCGTTCTGGATATTCTGACC  
GAAGCCGGTGTTCGTGTTGCACCGCATATCACCATTGGTCTGGATTTTCGGCAAAATC  
CACTGGGAATACAAAGCAATTGATATGCTGGTCAAATACCCGATTGATGTTCTGGTT  
CTGGATGTGCTGATTCCGACCAAAGGCACCGAAATGGAAAATGTTCCGAAACCGAG  
CGTTGAAGAAAGCCTGGAAGTTGTTAAATATGCCCGTGAAATGTTTGATGGCGAACT  
GAGCATTGGTTGTATGCGTCCGTTAGGTCGTTGGCGTCTGGAATTTGATCGTGGTGC  
AATTCTGACAGGTGTTGATCGTCTGACCAATCCGCCTCGTAAAGTTATTGAATGGGC  
AAAAGGTATTCGTGATGTCGAGATTATCTATGAATGCTGCGTGATG**TAACTCGAG**

**CATATG** – *NdeI* restriction site

**CTCGAG** – *XhoI* restriction site

**TAA** – Stop codon

### LipS1 (TK2109) protein sequence

MGSSHHHHHSSGLVPRGSHMAEPKKLKIYIPGIKFPSVSLTGNACALNCAHCGKHYL  
EGMRKPERGELLSYCLRLAEEGYNGCLLSGMDGRLKVPLDFYANEIKEIKKRTNLKLN  
AHVGFIDESDLEWVKYVDVVSDFVGDNDVIRRVYKIDKTVDDYLRVLDILTEAGVRV  
APHITIGLDFGKIHWEYKAIDMLVKYPIDVLDVLIPTKGTEMENVPKPSVEESLEVVK  
YAREMFDGELSIGCMRPLGRWRLEFDRGAILTGVDRLTNPPRKVIEWAKGIRDVEIIEYC  
CVM

**LipS2 (TK2248) codon-optimized gene sequence (Uniprot # Q5JHS9)**

**CATATG**CCGGAAATGGTTCGTGTTAGCTATGGCACCGCAATTGCAATGGGTCTGATT  
CGTGCAAAACTGCTGGCACGTCCGACCACCGCATATCTGATGACCTATTGGCCTGGT  
CGTTGTAGCAATGATTGTGCATTTTGTGCACAGGCACGTAGCAGCCGTGCAGATCTG  
GAAAAACTGAGCCGTGTTGTTTGGCCGAGCTTTATGCTGGAAGATGTTCTGGAAGGT  
CTGAAAAAAGGTAACCTTTCACGTATTTGCCTGCAGACCATTGATTATCCTGGTATG  
GTTGAAGATGTGTTTCGATCTGCTGGAAGCATTTAGCGATCTGAATCTGCCGATTAGC  
GTTAGCATTACACCGGTTGATAGCGAAACCCTGGAACGTTTTAAAGAACGTGGTGTG  
GATTATATTGGTGTGGTCTGGATGTTGCAAGCGAACGTCTGTTTCGTGAAATAAA  
CCGGATCTGAGCTGGGAAGAAGTTTGGGATTTTGCAGGTCGTGTTATTGATGTTTTT  
GGTCGTGGTAAAGCACTGCTGCATGTTATTGTTGGCCTGGGTGAAACCGATGGTGAA  
CTGGTTAATACCTTTATTCGTGCACGTGAAATTGGTGCCGATGTTAGCATTTTTGCAT  
TTACCCCGATTAAAGGCACCCGTCTGGAAAATCGTGAACCGCCTAGCCTGGAACATT  
ATCGTAAAATTCAGCTGGCCAAATATCTGGTGAGCATTGGTAAAGAAGATGCCATTG  
TTTTTGATGGCGATAGCATTAAAGGTTTCGCACTGAGCAAAGATGAAGTTGCAAAAA  
TTCCGACCACAGTGTTTATGACCCATGGTTGTCCGGGTTGTAATCGTCCGTATTATAA  
CGAACGTCCGGGTAAAGAACCGTATAACTATCCGCTGGCACCGAAACGTGAAGATT  
TTGAACGTACCCTGCGTCTGATTCTG**TAACTCGAG**

**CATATG** – *NdeI* restriction site

**CTCGAG** – *XhoI* restriction site

**TAA** – Stop codon

**LipS2 (TK2248) protein sequence**

MGSSHHHHHSSGLVPRGSHMPEMVRVSYGTAIAMGLIRAKLLARPTTAYLMTYWPG  
RCSNDCAFCAQARSSRADLEKLSRVVWPSFMLEDVLEGLKKGNFARICLQTIDYPGMV  
EDVFDLLEAFSDLNLPISVSITPVDSETLERFKERGVYIGVGLDVASERLFREIKPDLW  
EEVWDFAGRVIDVFRGKALLHVIVGLGETDGELVNTFIRAREIGADVSIFAFTPIKGTRL  
ENREPPSLEHYRKIQLAKYLVSIGKEDAIVFDGDSIKGFALSKDEVAKIPTTVFMTHGCPG  
CNRPYYNERPGEKPYNYPLAPKREDFERTLRLLIL

**Table S1: Primers for constructing LipS1 auxiliary cysteine and other ligand variants**

| <b>Mutant</b> | <b>Forward primer</b>                                                          | <b>Reverse primer</b>                                             |
|---------------|--------------------------------------------------------------------------------|-------------------------------------------------------------------|
| C54A LipS1    | 5'-GAACTGCTGAGCTAT <u>GCGC</u><br>TGGTCTGGCCGAA-3'                             | 5'-CTTCGGCCAGACGCAG <u>CG</u><br><u>C</u> ATAGCTCAGCAGTTC-3'      |
| C65A LipS1    | 5'-GAAGAAGGTTATAACGGT <u>GC</u><br><u>G</u> CTGCTGAGCGGTGGTATG-3'              | 5'-CATACCACCGCTCAGCAG <u>CG</u><br><u>C</u> ACCGTTATAACCTTCTTC-3' |
| C230A LipS1   | 5'-GGCGAACTGAGCATTGGT <u>GC</u><br><u>G</u> ATGCGTCCGTTAGGTCG-3'               | 5'-CGACCTAACGGACGCAT <u>CGC</u><br>ACCAATGCTCAGTTCGCC-3'          |
| C276A LipS1   | 5'-GTCGAGATTATCTATGA <u>AGC</u><br><u>G</u> TGCGTGATGTA <sup>ACT</sup> CGAG-3' | 5'-CTCGAGTTACATCACGC <u>ACG</u><br><u>C</u> TTCATAGATAATCTCGAC-3' |
| C277A LipS1   | 5'-GTCGAGATTATCTATGAATG<br><u>CGCG</u> GTGATGTA <sup>ACT</sup> CGAG-3'         | 5'-CTCGAGTTACATCAC <u>CGCGC</u><br>ATTCATAGATAATCTCGAC-3'         |
| H159A LipS1   | 5'-GGTGTTGTTGCACCG<br><u>GCG</u> ATCACCATTGGTCTG -3'                           | 5'-CAGACCAATGGTGAT <u>CGCCG</u><br>GTGCAACACGAACACC-3'            |

**Table S2: Primers for constructing LipS2 auxiliary cysteine and other ligand variants**

| <b>Mutant</b> | <b>Forward primer</b>                                         | <b>Reverse primer</b>                                         |
|---------------|---------------------------------------------------------------|---------------------------------------------------------------|
| C85A LipS2    | 5'-GGTAACTTTGCACGTATT <u>GCG</u><br>CTGCAGACCATTGATTATCCTG-3' | 5'-CAGGATAATCAATGGTCTGCA<br><u>GCGCA</u> ATACGTGCAAAGTTACC-3' |
| C276A LipS2   | 5'-GTGTTTATGACCCATGGT <u>GCG</u><br>CCGGGTTGTAATCGTCCG-3'     | 5'-CGGACGATTACAACCCGGC<br><u>GC</u> ACCATGGGTCATAAACAC-3'     |
| C279A LipS2   | 5'-GACCCATGGTTGTCCGGGT<br><u>GCGA</u> ATCGTCCGTATTATAACG-3'   | 5'-CGTTATAATACGGACGATTC<br><u>GC</u> ACCCGGACAACCATGGGTC-3'   |
| T28A LipS2    | 5'-GCTGGCACGTCCGAC <u>GCG</u><br>GCATATCTGATGACCTATTG-3'      | 5'-CAATAGGTCATCAGATATGC<br><u>CG</u> CGGTCGGACGTGCCAGC-3'     |
| S113A LipS2   | 5'-GATCTGAATCTGCCGATT<br><u>GCG</u> GTTAGCATTACACCG-3'        | 5'-CGGTGTAATGCTAACC <u>GCAA</u><br>TCGGCAGATTCAGATC-3'        |
| S115A LipS2   | 5'-GAATCTGCCGATTAGCGTT<br><u>GCG</u> ATTACACCGGTTGATAG-3'     | 5'-CTATCAACCGGTGTAATCG<br>CAAC <u>GCTA</u> ATCGGCAGATTC-3'    |
| H178A LipS2   | 5'-GTCGTGGTAAAGCACTGCTG<br><u>GCG</u> GTTATTGTTGGCCTGGG-3'    | 5' -CCCAGGCCAACAATAAC <u>GCG</u><br>CAGCAGTGCTTTACCACGAC-3'   |

**Table S3: Primers for constructing LipS1<sub>ARS</sub> and LipS2<sub>ARS</sub> cysteine variants**

| <b>Mutant</b>      | <b>Forward primer</b>                                              | <b>Reverse primer</b>                          |
|--------------------|--------------------------------------------------------------------|------------------------------------------------|
| LipS1              | 5'-GCCTGACCGGTAATGCAG                                              | 5'-CAGATAATGTTTACCCGCATG                       |
| C27A/C31A/<br>C34A | <u>CGGCACTGAATGCGGCACAT</u><br><u>GCGGGTAAACATTATCTG-3'</u>        | TGCCGCATTCAGTGCCGCTGCAT<br>TACCGGTCAGGC-3'     |
| LipS2              | 5'-GACCTATTGGCCTGGTCGT                                             | 5'-CTGCTACGTGCCTGTGCCGCA                       |
| C39A/C43A/<br>C46A | <u>GCGAGCAATGATGCGGCATTT</u><br><u>GCGGCACAGGCACGTAGC</u><br>AG-3' | AATGCCGCATCATTGCTCGCACG<br>ACCAGGCCAATAGGTC-3' |

**Table S4: LC-MS gradient conditions for the analysis of substrates/products in LipS1 and LipS2 reactions**

| Time (min) | 0.1% Formic acid in H <sub>2</sub> O | Acetonitrile | Flow (mL/min) |
|------------|--------------------------------------|--------------|---------------|
| 0          | 95%                                  | 5%           | 0.3           |
| 0.5        | 95%                                  | 5%           | 0.3           |
| 3          | 50%                                  | 50%          | 0.3           |
| 4.5        | 50%                                  | 50%          | 0.3           |
| 5.5        | 95%                                  | 5%           | 0.3           |
| 7          | 95%                                  | 5%           | 0.3           |

**Table S5: MRM fragmentation products monitored by LC-MS.**

| Compound                              | Parent ion* | Product Ion 1 <sup>§</sup> | Product Ion 2 <sup>§</sup> |
|---------------------------------------|-------------|----------------------------|----------------------------|
| AtsA peptide                          | 474.4 (112) | 229.1 (18)                 | 153 (26)                   |
| 5'-dAH                                | 252.1 (90)  | 136 (13)                   | 119 (50)                   |
| Trp                                   | 188 (114)   | 145.9 (13)                 | 117.9 (25)                 |
| Methionine                            | 150.1 (65)  | 104 (8)                    | 56 (16)                    |
| Lipoyl peptide                        | 996.5 (208) | 776.3 (30)                 | 274.1 (46)                 |
| Monothiolated peptide                 | 964.5 (222) | 584.3 (32)                 | 242.1 (48)                 |
| Octanoyl peptide                      | 932.5 (188) | 712.4 (29)                 | 210.1 (53)                 |
| Monothiolated <sup>34</sup> S peptide | 966.5 (222) | 586.3 (32)                 | 244.1 (48)                 |
| Lipoyl <sup>34/32</sup> S peptide     | 998.5 (208) | 778.3 (30)                 | 276.1 (46)                 |

\*Respective fragmentor voltage in parenthesis

§ Respective collision energies in parenthesis



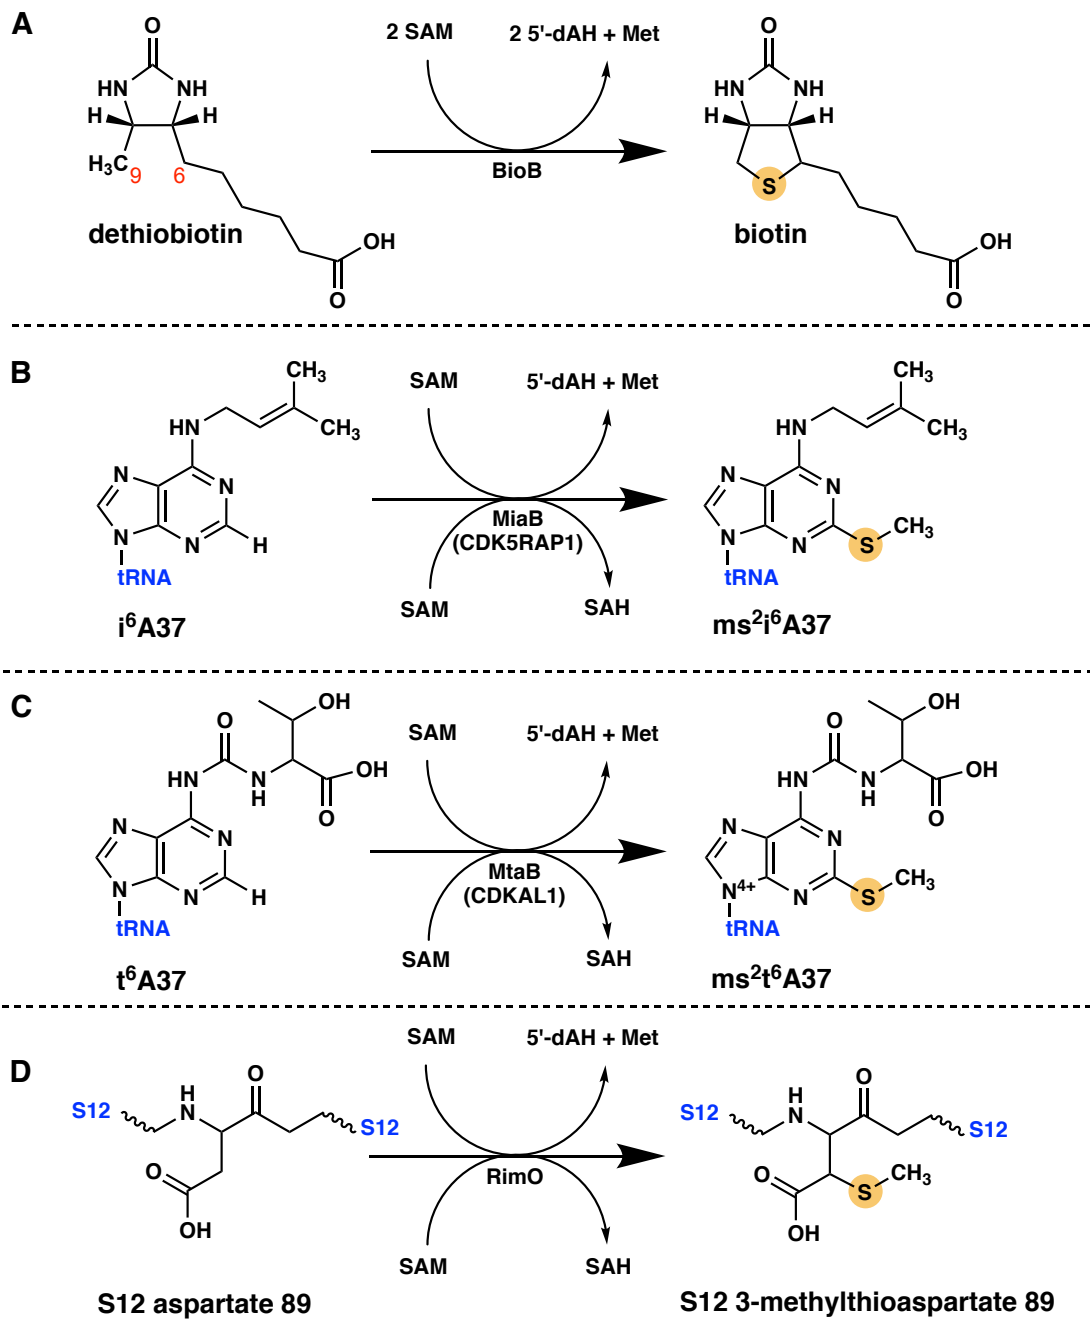

**Figure S1:** Other RS enzymes involved in sulfur insertion reactions **A)** BioB **B)** MiaB **C)** MtaB **D)** RimO

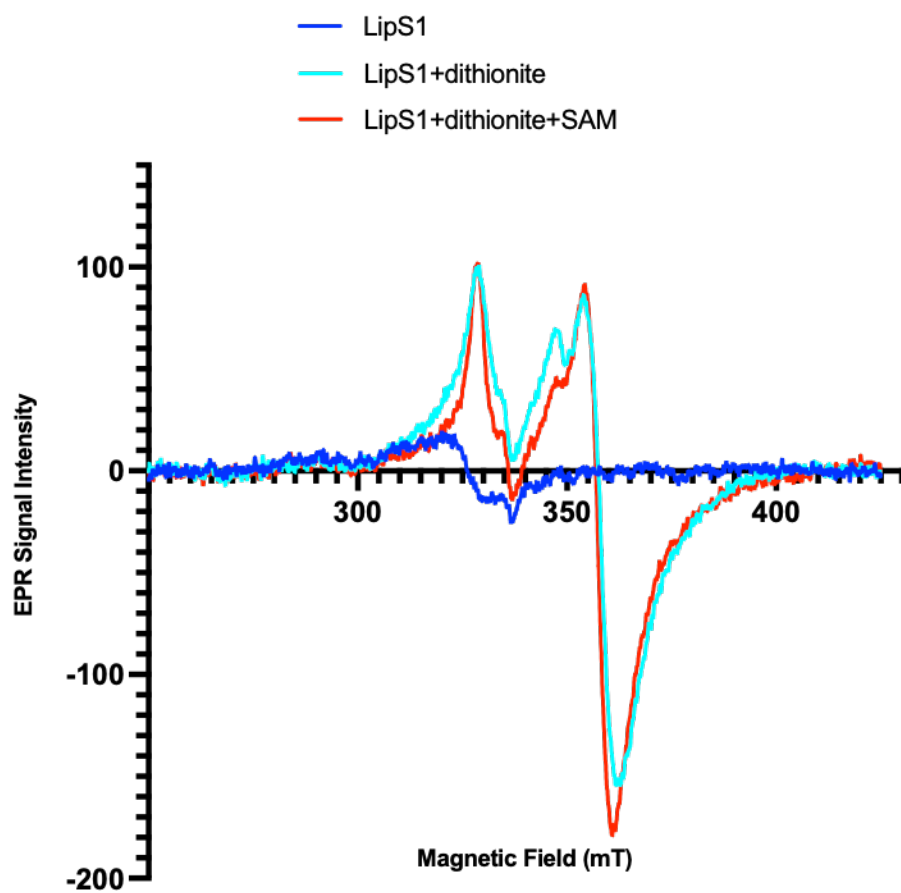

**Figure S2.** EPR spectra of 200  $\mu\text{M}$  LipS1<sub>WT</sub> (blue), 200  $\mu\text{M}$  LipS1<sub>WT</sub> + 2 mM dithionite (cyan), and 200  $\mu\text{M}$  LipS1<sub>WT</sub> + 2 mM dithionite + 1 mM SAM (red). Spectra were recorded at 10 K.

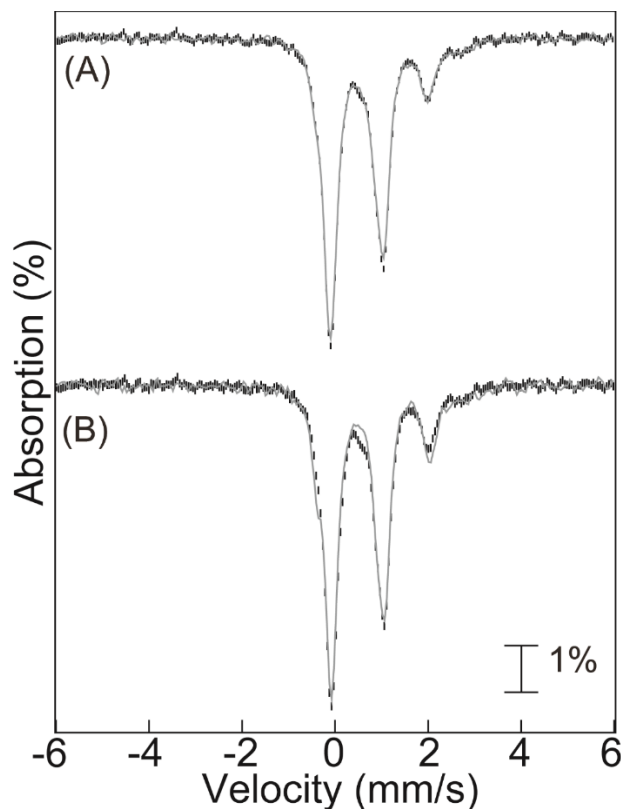

**Figure S3.** Comparison of the 4.2-K Mössbauer spectrum of reconstituted LipS1 $\Delta$ RS collected without an externally applied magnetic field (vertical bars) to the 4.2-K Mössbauer spectrum of reconstituted LipS1 $\Delta$ RS collected with a 53-mT magnetic field oriented parallel to the  $\gamma$  beam (solid line, **A**); the fact that these spectra are virtually identical reveals the absence of [Fe<sub>3</sub>S<sub>4</sub>]<sup>0</sup>-like clusters. Comparison of the 4.2-K Mössbauer spectrum of reconstituted LipS1 $\Delta$ RS collected without an externally applied magnetic field (vertical bars) to the 4.2-K Mössbauer spectrum of non-reconstituted LipS1 $\Delta$ RS collected without an externally applied magnetic field (solid line, **B**). The fact that the major contribution to the spectra is the quadrupole doublet associated with [Fe<sub>4</sub>S<sub>4</sub>]<sup>2+</sup> clusters suggests that the auxiliary cluster as is an [Fe<sub>4</sub>S<sub>4</sub>] cluster.

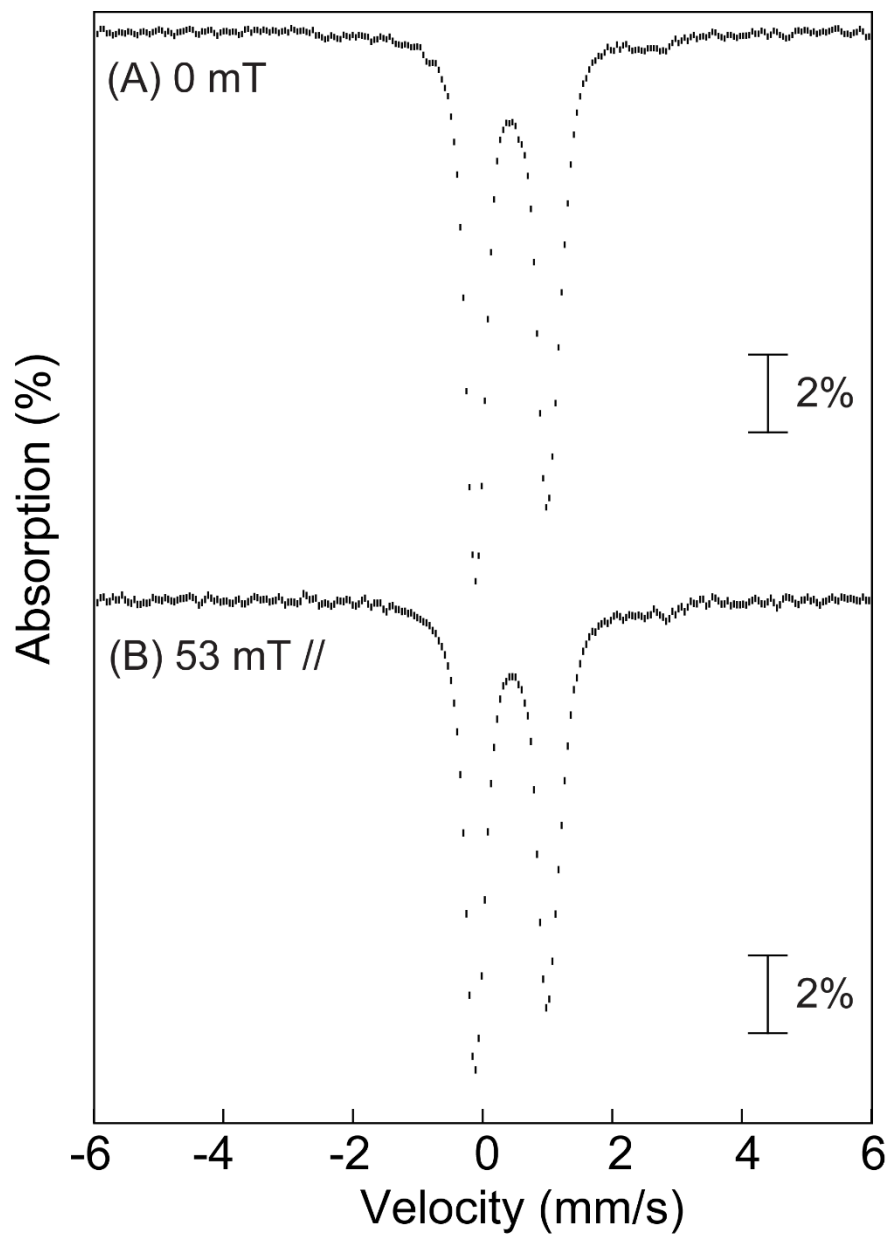

**Figure S4.** Mössbauer spectra of reconstituted LipS2<sub>WT</sub> collected at 4.2 K with an external applied magnetic field of (A) 0 mT or (B) 53 mT oriented parallel to the  $\gamma$  beam (vertical bars).

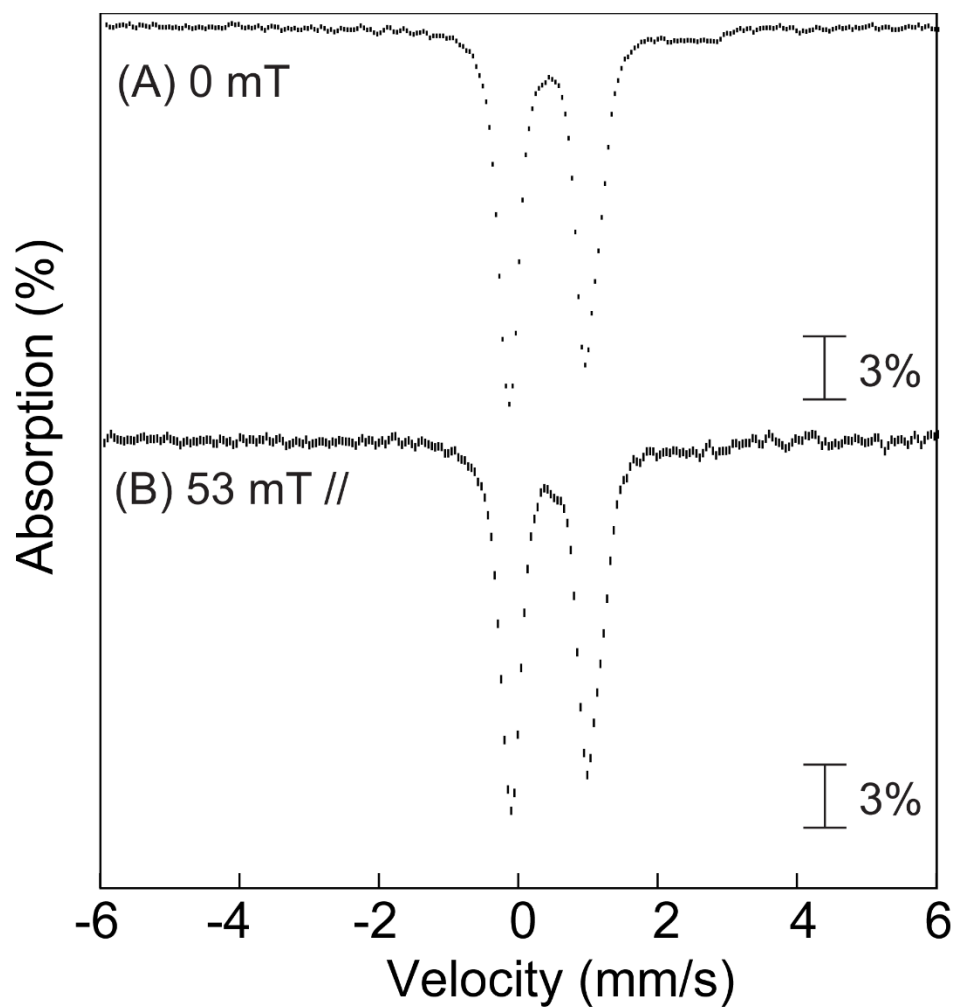

**Figure S5.** Mössbauer spectra of reconstituted LipS2 $\Delta$ RS collected at 4.2 K with an external applied magnetic field of (A) 0 mT or (B) 53 mT oriented parallel to the  $\gamma$  beam (vertical bars).

**Table S6:** Parameters used to simulate Mössbauer spectra

| Protein              | Fe species                                                                              | $\delta$ (mm/s)                        | $\Delta E_Q$ (mm/s) | % $^{57}\text{Fe}$ | Total $^{57}\text{Fe}$ /protomer | # cluster(s)/protomer | of  |
|----------------------|-----------------------------------------------------------------------------------------|----------------------------------------|---------------------|--------------------|----------------------------------|-----------------------|-----|
| LipS1 <sub>WT</sub>  | [Fe <sub>4</sub> S <sub>4</sub> ] <sup>2+</sup>                                         | 0.46                                   | 1.12                | 47                 | 3.29                             | 0.8                   |     |
|                      | [3Fe-<br>4S] <sup>0</sup>                                                               | Fe <sup>2.5</sup><br>Fe <sup>III</sup> | 0.45<br>0.31        | 1.00<br>0.50       | 20<br>10                         | 2.10                  | 0.7 |
|                      | [Fe <sub>2</sub> S <sub>2</sub> ] <sup>2+</sup>                                         | 0.25                                   | 0.67                | 12                 | 0.84                             | 0.4                   |     |
|                      | N/O-coordinated<br>high-spin Fe <sup>II</sup>                                           | 1.12                                   | 2.67                | 11                 | 0.77                             | -                     |     |
| LipS1 <sub>ΔRS</sub> | [Fe <sub>4</sub> S <sub>4</sub> ] <sup>2+</sup>                                         | 0.46                                   | 1.12                | 69                 | 2.83                             | 0.7                   |     |
|                      | N/O-coordinated<br>unique Fe site of<br>[Fe <sub>4</sub> S <sub>4</sub> ] <sup>2+</sup> | 0.85                                   | 2.25                | 17                 | 0.70                             | 0.3                   |     |
|                      | [Fe <sub>2</sub> S <sub>2</sub> ] <sup>2+</sup>                                         | 0.25                                   | 0.67                | 9                  | 0.37                             | 0.2                   |     |
|                      | N/O-coordinated<br>high-spin Fe <sup>II</sup>                                           | 1.20                                   | 2.9                 | 5                  | 0.2                              | -                     |     |
| LipS2 <sub>WT</sub>  | [Fe <sub>4</sub> S <sub>4</sub> ] <sup>2+</sup>                                         | 0.47                                   | 1.12                | 90                 | 6.12                             | 1.5                   |     |
|                      | [Fe <sub>2</sub> S <sub>2</sub> ] <sup>2+</sup>                                         | 0.25                                   | 0.67                | 5                  | 0.34                             | 0.2                   |     |
|                      | N/O-coordinated<br>high-spin Fe <sup>II</sup>                                           | 1.28                                   | 2.71                | 5                  | 0.34                             | -                     |     |
| LipS2 <sub>ΔRS</sub> | [Fe <sub>4</sub> S <sub>4</sub> ] <sup>2+</sup>                                         | 0.47                                   | 1.12                | 90                 | 3.48                             | 0.9                   |     |
|                      | [Fe <sub>2</sub> S <sub>2</sub> ] <sup>2+</sup>                                         | 0.25                                   | 0.67                | 2                  | 0.08                             | 0.04                  |     |
|                      | N/O-coordinated<br>high-spin Fe <sup>II</sup>                                           | 1.28                                   | 2.71                | 8                  | 0.31                             | -                     |     |

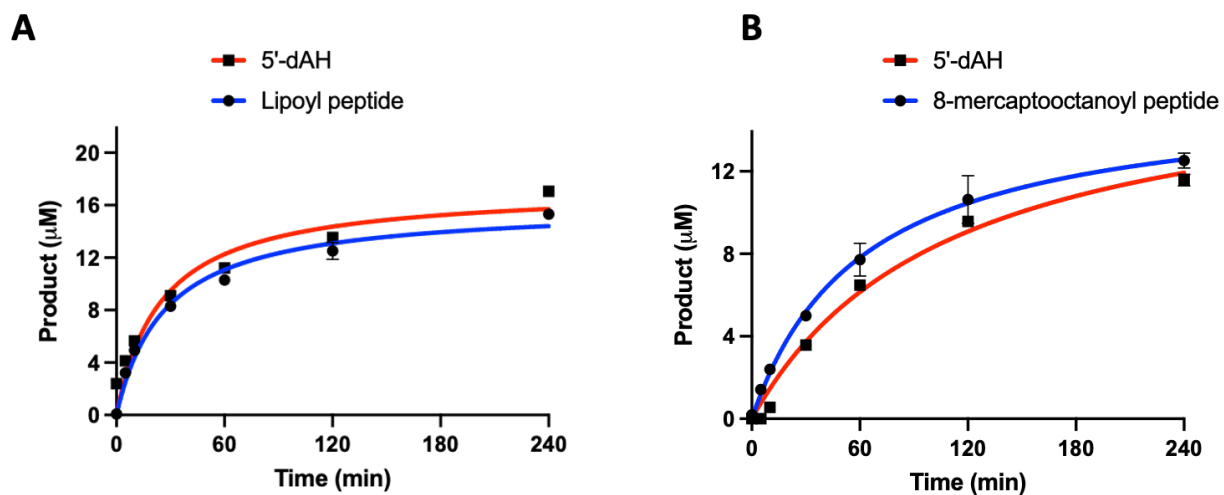

**Figure S6.** Reactions of **A)** LipS1<sub>WT</sub> with 8-mercaptioctanoyl peptide substrate **B)** LipS2<sub>WT</sub> with octanoyl peptide substrate. The reactions contained 10 µM LipS1 or 10 µM LipS2, 300 µM peptide substrate, 10 µM ferredoxin, 4 µM ferredoxin reductase, 1 mM NADPH and 0.5 mM SAM. Reactions were conducted at 40 °C in triplicate. Error bars represent one standard deviation from the mean.

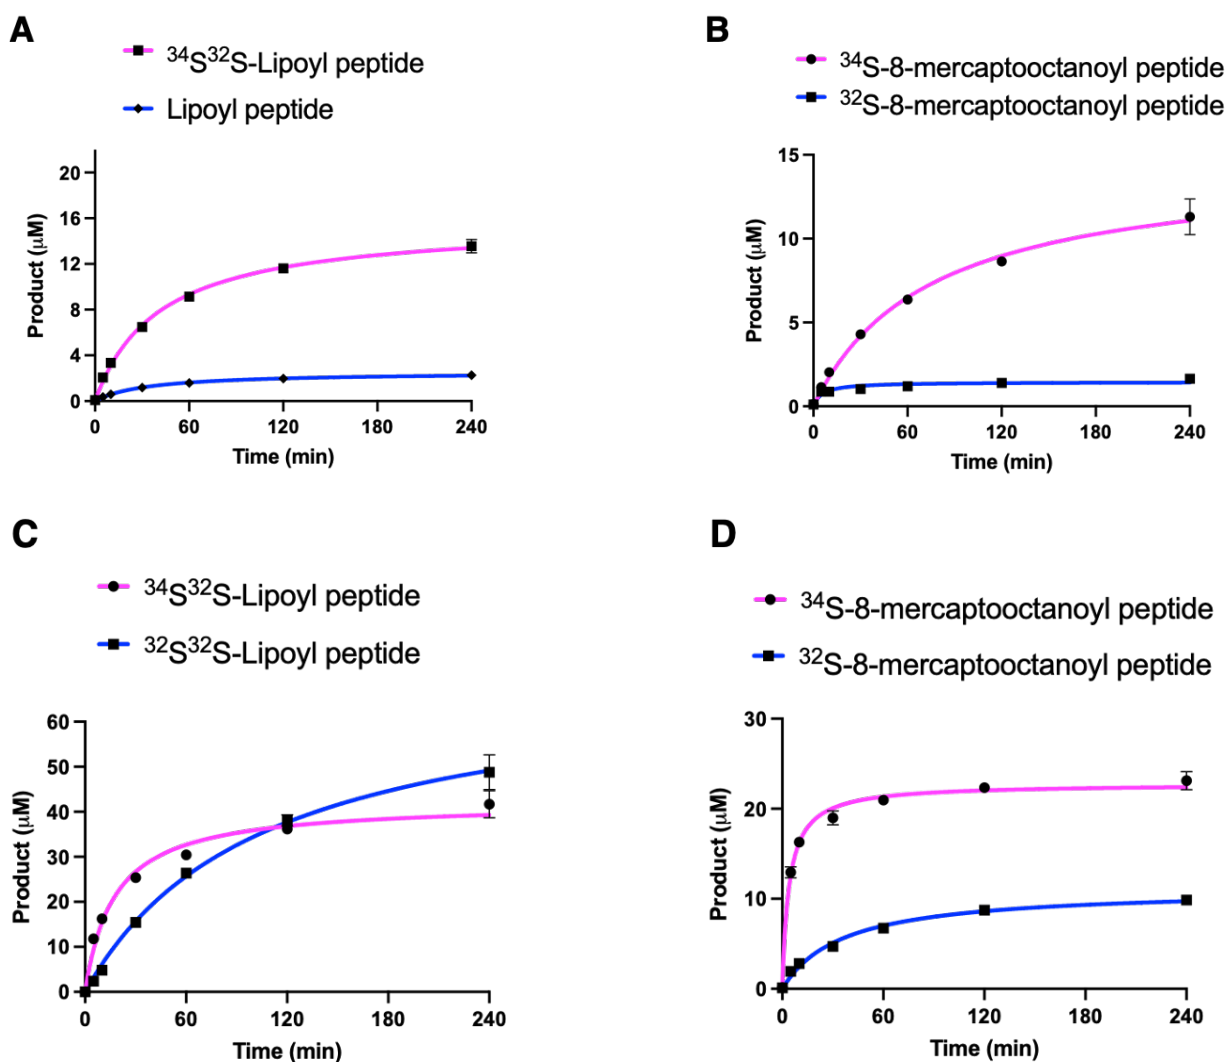

**Figure S7.** A) and B) <sup>34</sup>S-labeled LipS1 and <sup>34</sup>S-labeled LipS2 reactions with 8-mercaptooctanoyllysyl peptide or with octanoyllysyl peptide, respectively, using the ferredoxin/ferredoxin reductase/NADPH reducing system. C) and D) <sup>34</sup>S-labeled LipS1 and <sup>34</sup>S-labeled LipS2 reactions with 8-mercaptooctanoyllysyl peptide and octanoyllysyl peptide, respectively, using dithionite as a reductant. The reactions contained 10 µM LipS1 or 10 µM LipS2, 10 µM ferredoxin, 4 µM ferredoxin reductase, and 1.5 mM NADPH, 300 µM substrate, and 0.5 mM SAM. When dithionite replaced the ferredoxin/ferredoxin reductase/NADPH



reducing system it was used at a concentration of 1.5 mM. Reactions were conducted at 40 °C in triplicate. Error bars represent one standard deviation from the mean.

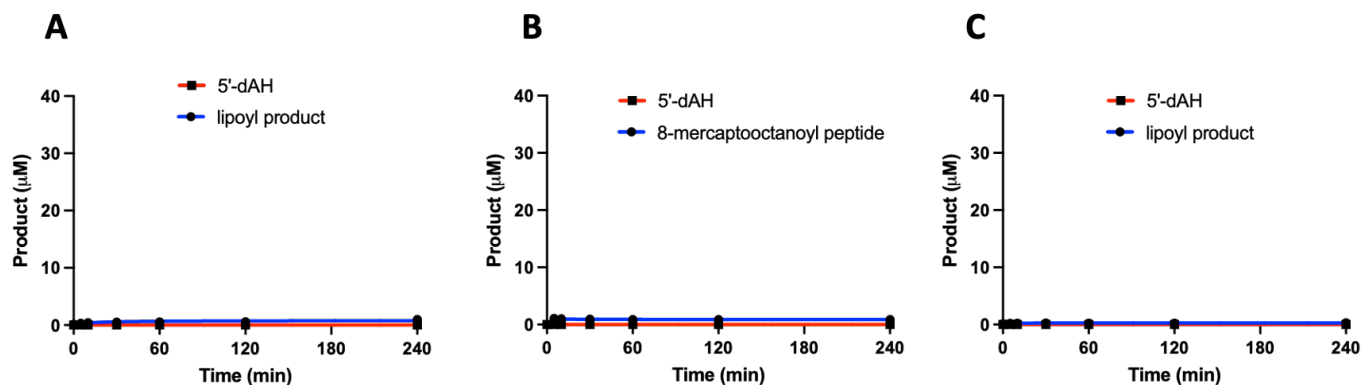

**Figure S8.** Reactions of **A)** LipS1 $\Delta$ RS with 8-mercaptooctanoyl peptide substrate **B)** LipS2 $\Delta$ RS with octanoyl peptide substrate **C)** LipS1 $\Delta$ RS and LipS2 $\Delta$ RS with octanoyl peptide. The reactions contained 10  $\mu\text{M}$  LipS1 and/or 10  $\mu\text{M}$  LipS2, 300  $\mu\text{M}$  octanoyl peptide substrate, 0.5 mM dithionite and 0.5 mM SAM. Reactions were conducted at 45 °C in triplicate. Error bars represent one standard deviation from the mean.

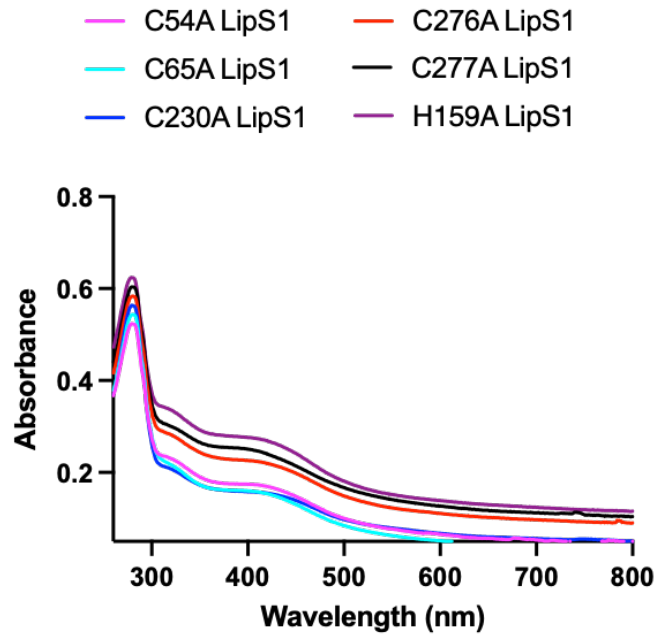

**Figure S9:** UV-Vis spectra of 8.4  $\mu\text{M}$  LipS1 auxiliary cluster ligand variants (normalized to the absorption at 280 nm).

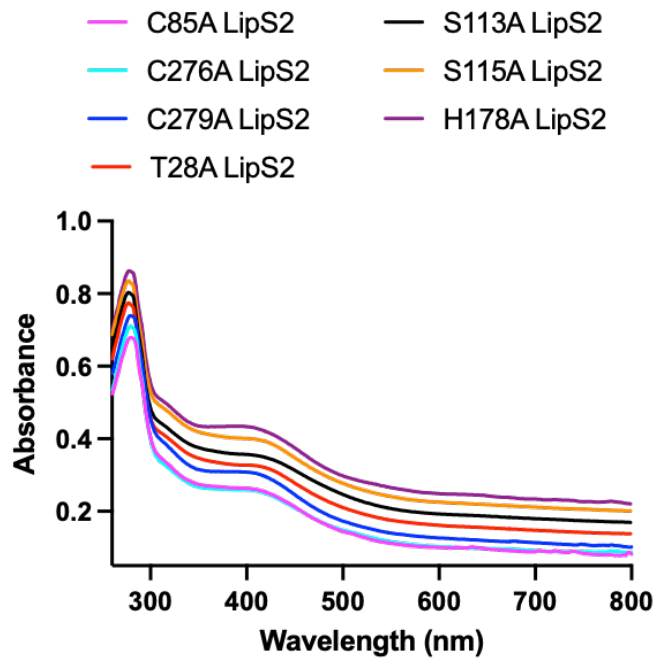

**Figure S10:** UV-Vis spectra of 9  $\mu\text{M}$  LipS2 auxiliary cluster ligand variants (normalized to the absorption at 280 nm).

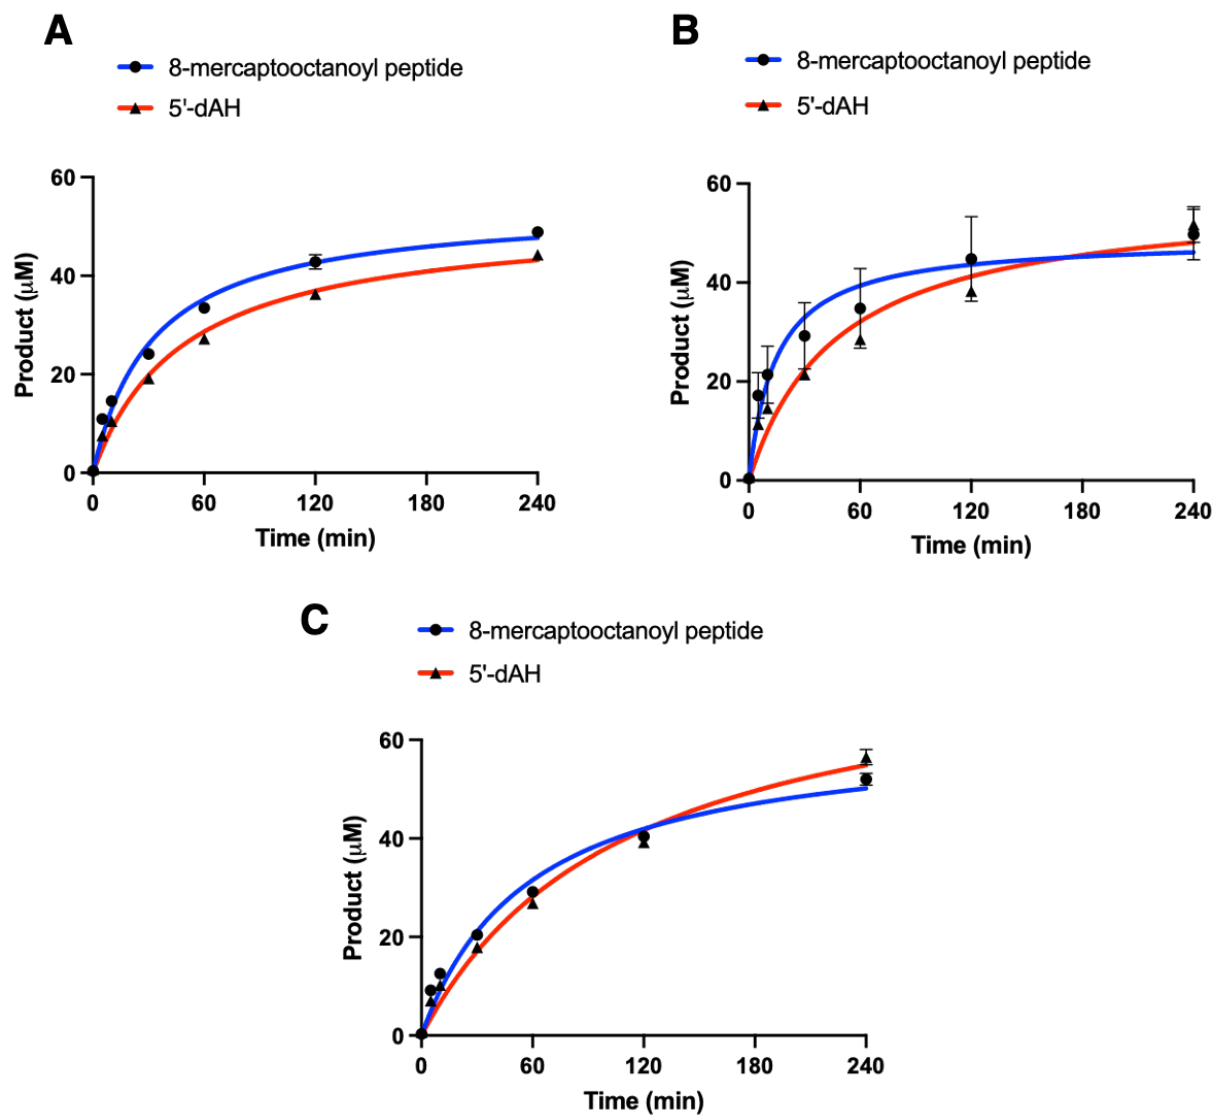

**Figure S11.** Reactions of **A)** T28A LipS2 **B)** S113A LipS2 **C)** S115A LipS2 with octanoyllysyl peptide. The reactions contained 10  $\mu\text{M}$  LipS2 variant, 300  $\mu\text{M}$  substrate, 1.5 mM dithionite and 0.5 mM SAM. Reactions were conducted at 45  $^{\circ}\text{C}$  in triplicate. Error bars represent one standard deviation from the mean.

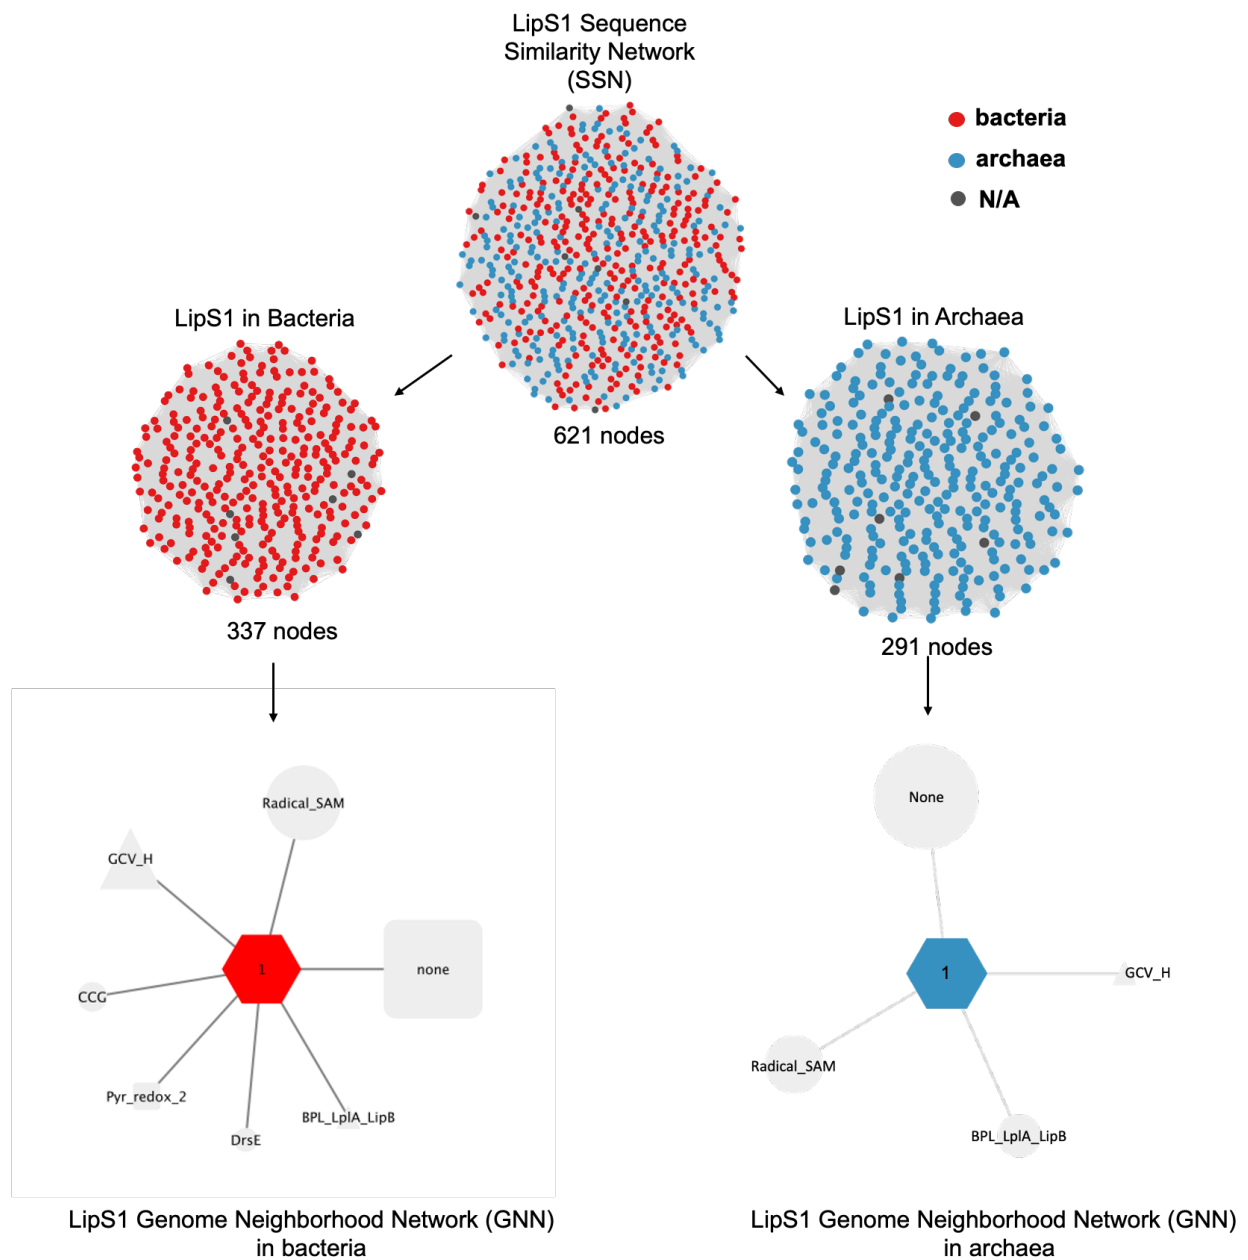

**Figure S12.** Genome neighborhood analysis of Megacluster 4\_7 (LipS1) in bacteria and archaea obtained from radicalSAM.org.

**GCV\_H** = H-protein of the glycine cleavage system (Pfam01597)

**Radical\_SAM** = Radical-SAM domain containing protein (Pfam04055)

**CCG** = cysteine-rich domain/heterodisulfide reductase subunit B (Pfam02754)

**BPL\_LplA\_LipB** = Biotin/lipoate A/B protein ligase family (Pfam03099)

**Pyr\_redox\_2** = Heterodisulfide reductase subunit A/pyridine nucleotide-disulphide oxidoreductase (Pfam07992)

**DrsE** = Putative peroxiredoxin/sulfur reduction protein (Pfam02635)

**None** = Neighbor not associated with a Pfam family (20% of protein in UniProt are not assigned to a Pfam family). 'None' assigned to the 'no Pfam' family.

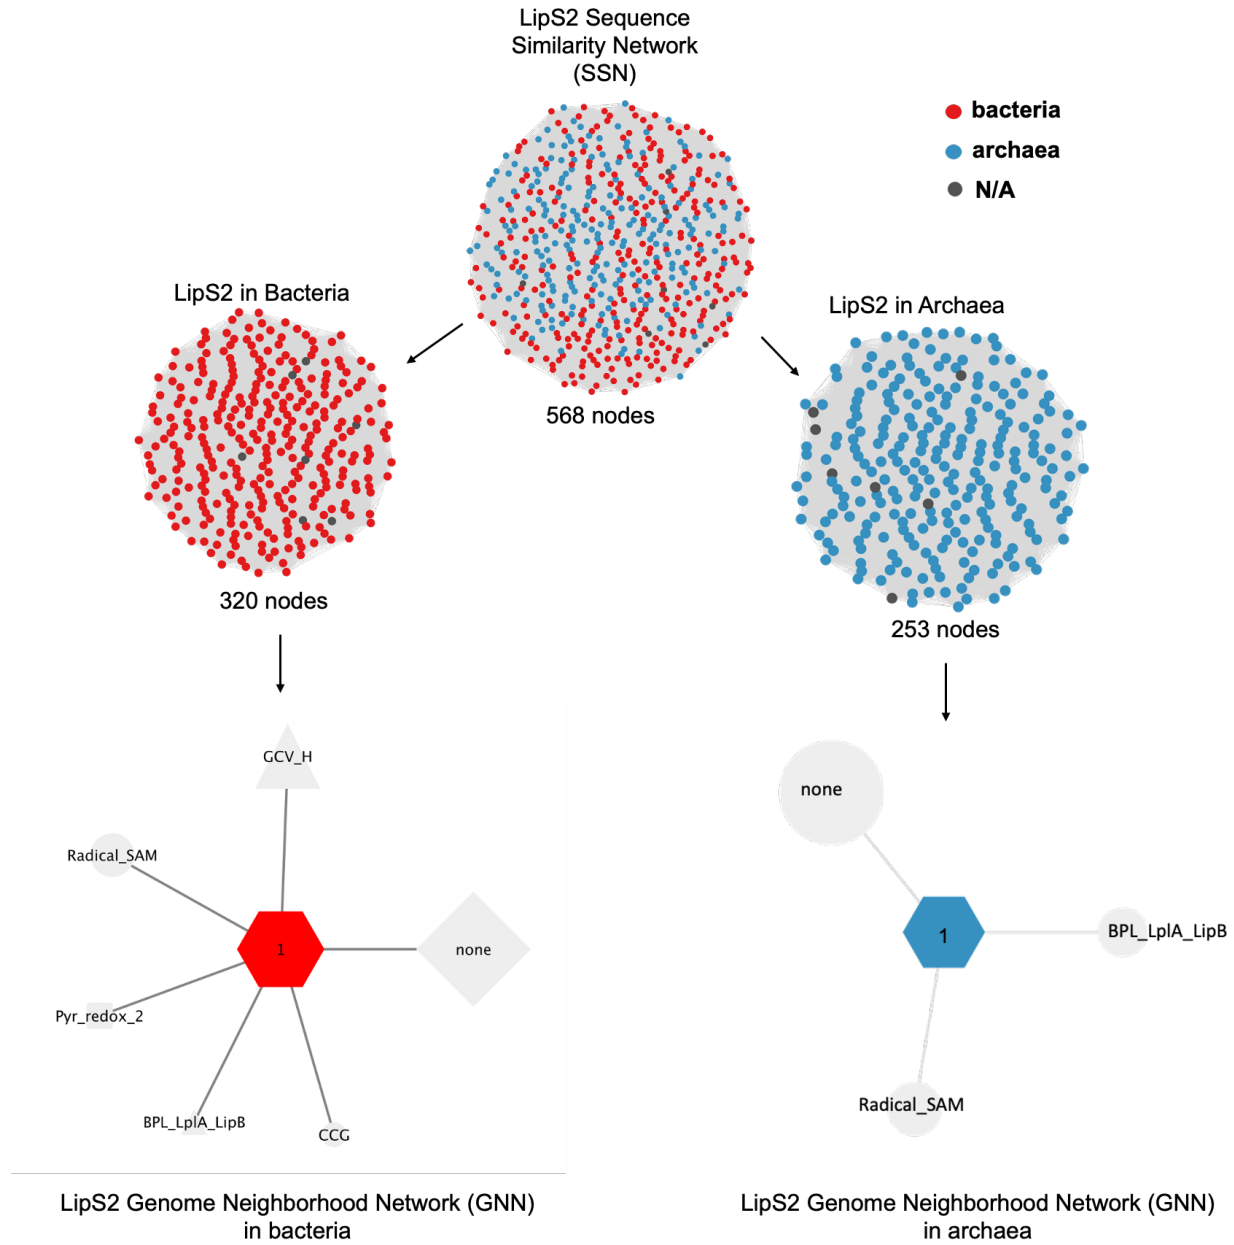

**Figure S13.** Genome analysis of Megacluster 4\_8 (LipS2) in bacteria and archaea obtained from radicalSAM.org.

**GCV\_H** = H-protein of the glycine cleavage system (Pfam01597)

**Radical\_SAM** = Radical-SAM domain containing protein (Pfam04055)

**CCG** = cysteine-rich domain/heterodisulfide reductase subunit B (Pfam02754)

**BPL\_LplA\_LipB** = Biotin/lipoate A/B protein ligase family (Pfam03099)

**Pyr\_redox\_2** = Heterodisulfide reductase subunit A/pyridine nucleotide-disulphide oxidoreductase (Pfam07992)

**None** = Neighbor not associated with a Pfam family (20% of protein in UniProt are not assigned to a Pfam family). 'None' assigned to the 'no Pfam' family.

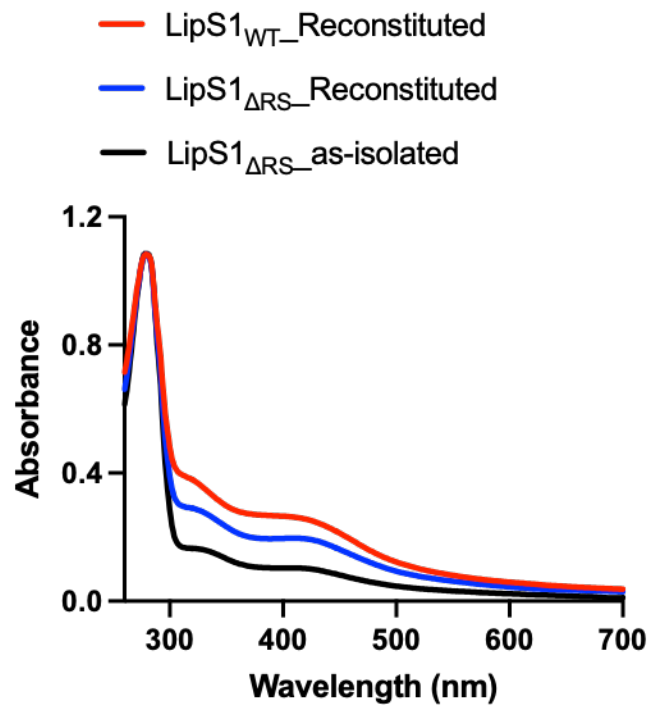

**Figure S14.** Comparison of the UV-vis spectra of reconstituted LipS1<sub>WT</sub> (red), reconstituted LipS1<sub>ΔRS</sub> (blue), and as-isolated LipS1<sub>ΔRS</sub> (black) proteins (normalized to the absorption at 280 nm).



Model Confidence:

- Very high (pLDDT >90)
- Confident (90 > pLDDT > 70)
- Low (70 > pLDDT > 50)
- Very low (pLDDT < 50)

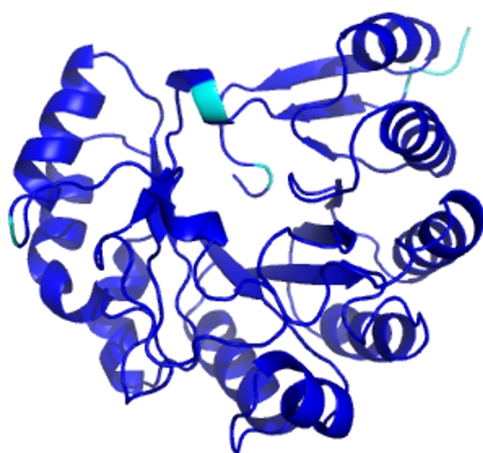

LipS1

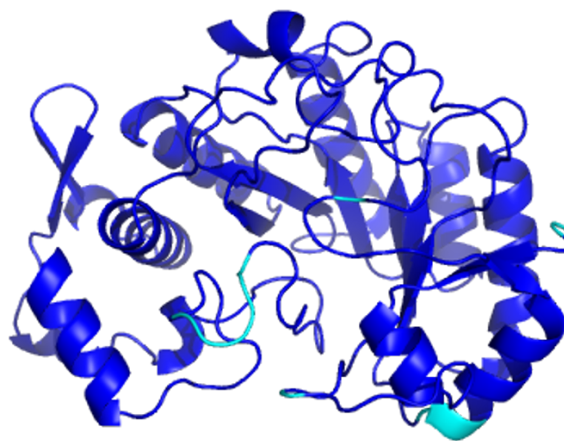

LipS2

**Figure S15.** Confidence scores of LipS1 and LipS2 models based on AlphaFold server. AlphaFold server predicts per-residue confidence score (pLDDT) in the range of 0 to 100.
